# Supplementary material
Source: publisher site journal article supplement (https://www.dovepress.com/article/303877)
Supplement: Supplementary file 1 [file get_supplementary_file.php]

**Table S1** Results of the fixed effects of the mixed linear regression exploring TcPCO2 changes after each ECT session, taking into account the interaction between time of assessment and cooperation with the voluntary hyperventilation procedure.

*Est SE df t p-value*

Intercept 35.27 2.34 27.045 15.07 <0.0001

Number of ECT sessions 0.13 0.06 555.51 2.11 0.035

T2 -0.84 1.62 551.90 -0.52 0.604

T3 0.69 1.68 551.97 0.41 0.683

T4 0.54 1.68 551.97 0.32 0.746

T5 1.08 1.62 551.90 0.67 0.506

T6 1.03 1.62 551.90 0.63 0.526

T7 3.69 1.62 551.90 2.28 0.023

T8 12.30 1.62 551.90 7.61 <0.0001

Cooperation with VHV 3.65 1.25 552.73 2.91 0.004

T2*Cooperation 0.63 1.71 551.90 0.37 0.711

T3*Cooperation -2.91 1.77 551.97 -1.64 0.101

T4*Cooperation -4.65 1.77 551.97 -2.62 0.009

T5*Cooperation -3.88 1.72 551.91 -2.26 0.024

T6*Cooperation -3.12 1.71 551.90 -1.82 0.069

T7*Cooperation -2.68 1.71 551.90 -1.56 0.118

T8*Cooperation -2.58 1.72 551.90 -1.50 0.134

**Abbreviations:** df, degrees of freedom; ECT, Electroconvulsive therapy, Est, estimate; min, minutes; SE, Standard error.

**Notes:** Transcutaneous carbon dioxide measure times considered (T1-T8) throughout the ECT session. Estimates for T2-T8 are shown as T1 was considered the reference category.

T1, basal values of TcPCO2 before the treatment session; T2, during preoxygenation and at the beginning of voluntary hyperventilation; T3, at the end of voluntary hyperventilation and beginning of anesthesia induction; T4, minimum value achieved after the 2-min voluntary hyperventilation; T5, after manual ventilation assistance performed avoiding vigorous hyperventilation, once the patient is asleep; T6, values at the moment of ECT stimulus delivery; T7, values at the end of the seizure; T8, post-ECT period value after patient’s recovery of autonomous breathing and consciousness and at the time of transferring the patient to the recovery room.
